# Supplementary material for: Fentanyl Structure as a Scaffold for Opioid/Non-Opioid Multitarget Analgesics
Source: MDPI journal article supplement (doi:10.3390/ijms23052766), 2022-03-02
Supplement: s1 [file s1]

## Supplementary Materials

to:

## Fentanyl structure as a scaffold for opioid/non-opioid multitarget analgesics

by

Piotr F. J. Lipiński<sup>1,\*</sup>, Joanna Matalińska<sup>1</sup>

<sup>1</sup> Department of Neuropeptides, Mossakowski Medical Research Institute Polish Academy of Sciences, Pawińskiego 5, 02–106 Warsaw, Poland;  
plipinski@imdik.pan.pl, jmatalinska@imdik.pan.pl

\* Correspondence: plipinski@imdik.pan.pl.

### Table of contents:

|                                                                                                                           |       |
|---------------------------------------------------------------------------------------------------------------------------|-------|
| <b>Scheme S1.</b> Initial synthetic steps towards compounds <b>2.6</b> and <b>2.7</b> .                                   | SM-2  |
| <b>Figure S1.</b> Correlational analysis of affinity data regarding fentanyl-related MOR/I2-IBS ligands.                  | SM-3  |
| <b>Figure S2.</b> Correlational analysis of affinity data regarding fentanyl-related MOR/CB <sub>1</sub> R ligands.       | SM-4  |
| <b>Scheme S2.</b> Reaction of norfentanyl ( <b>5.19</b> ) with $\alpha,\omega$ -bromochloroalkanes.                       | SM-5  |
| <b>Figure S3.</b> Correlational analysis of affinity data regarding fentanyl-related MOR/D <sub>2</sub> -likeR ligands.   | SM-5  |
| The QSAR Equations based on indicator variables for MOR/D <sub>2</sub> R ligands.                                         | SM-6  |
| <b>Table S1.</b> Indicator variables matrix for compounds <b>5.3</b> – <b>5.18</b> .                                      | SM-6  |
| <b>Table S2.</b> Indicator variables and their coefficients (for Eq S1).                                                  | SM-6  |
| <b>Table S3.</b> Indicator variables and their coefficients (for Eq S2). Compounds with n = 2, 4, 5.                      | SM-7  |
| <b>Table S4.</b> Indicator variables and their coefficients (for Eq S3). Compounds with n = 3, 6.                         | SM-7  |
| <b>Figure S4.</b> Plot of MOR affinities found for ureas versus those found for carbamates of the <b>7.1-7.12</b> series. | SM-8  |
| <b>Table S5.</b> Structures and activity data for compounds <b>8.10-8.84</b> .                                            | SM-9  |
| <b>Table S6.</b> Structures and activity data for compounds <b>8.86-8.147</b> .                                           | SM-13 |
| <b>Table S7.</b> Crystal structures of the $\mu$ -opioid receptor.                                                        | SM-23 |
| <b>Table S8.</b> Crystal structures of selected GPCRs relevant to the scope of the review.                                | SM-23 |
| <b>Table S9.</b> Crystal structures of the $\sigma$ -receptors.                                                           | SM-26 |

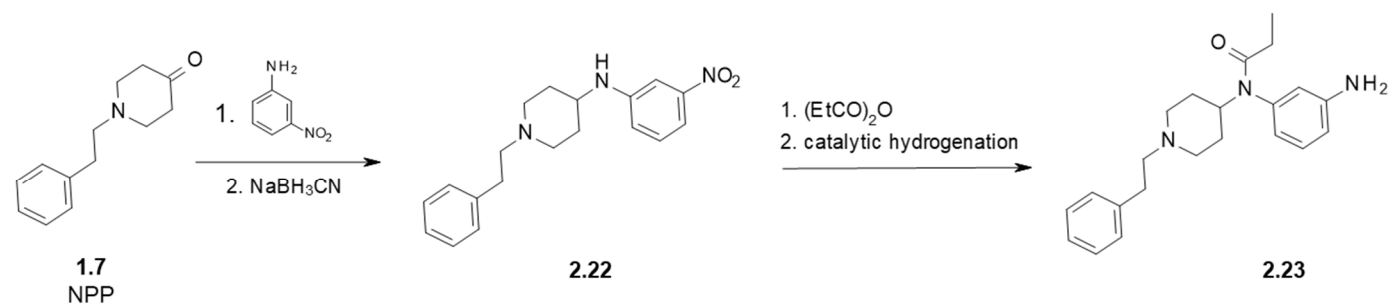

And further as in Scheme 2 of the main text.

**Scheme S1.** Initial synthetic steps towards compounds 2.6 and 2.7.

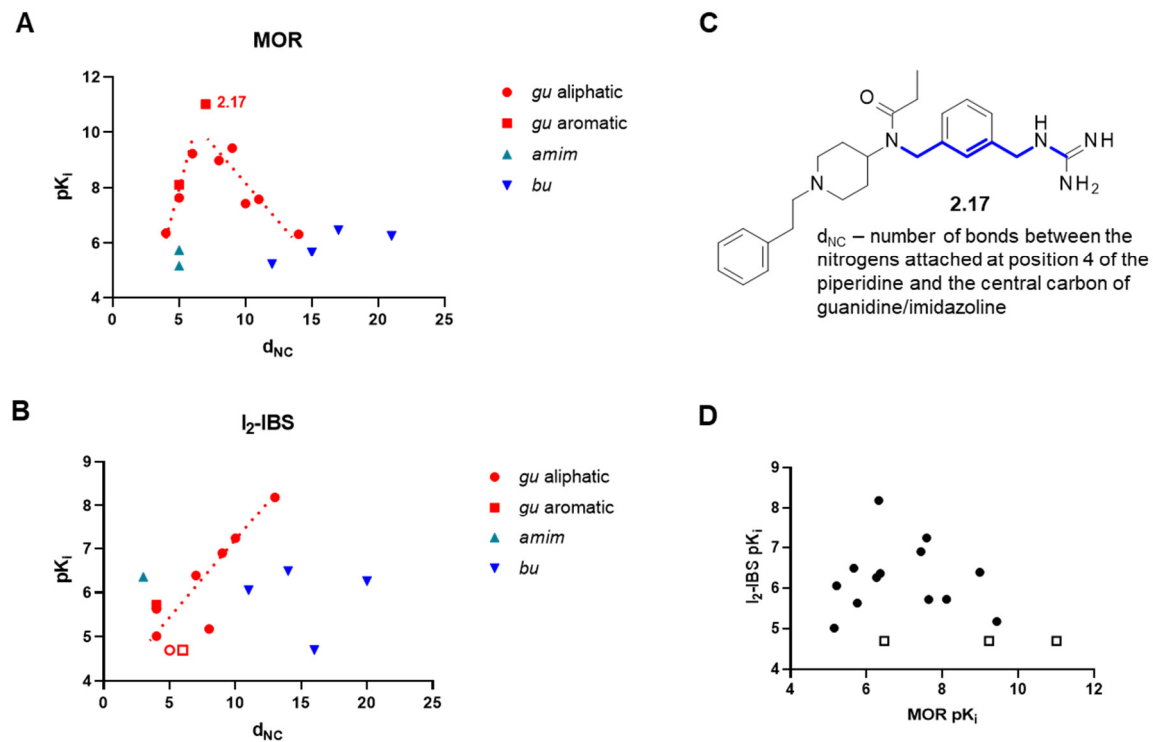

**Figure S1.** Correlational analysis of affinity data regarding fentanyl-related MOR/I<sub>2</sub>-IBS ligands. A) MOR: Plot of the negative logarithm of the inhibition constant ( $pK_i$ ) against the linker length expressed as  $d_{NC}$ ; the dashed lines mark a putative correlation. B) I<sub>2</sub>-IBS: Plot of the negative logarithm of the inhibition constant ( $pK_i$ ) against the linker length expressed as  $d_{NC}$ ; the dashed lines mark a putative correlation. C) Definition of the  $d_{NC}$  variable with the example based on compound **2.17**, blue bonds are those counted for the calculation of  $d_{NC}$ , D) Plot of MOR  $pK_i$  against I<sub>2</sub>-IBS  $pK_i$ . Empty points are given for compounds for which an arbitrary value of  $K_i = 20 \mu\text{M}$  was assigned for the purposes of the plot (reported as  $K_i > 10 \mu\text{M}$ ).

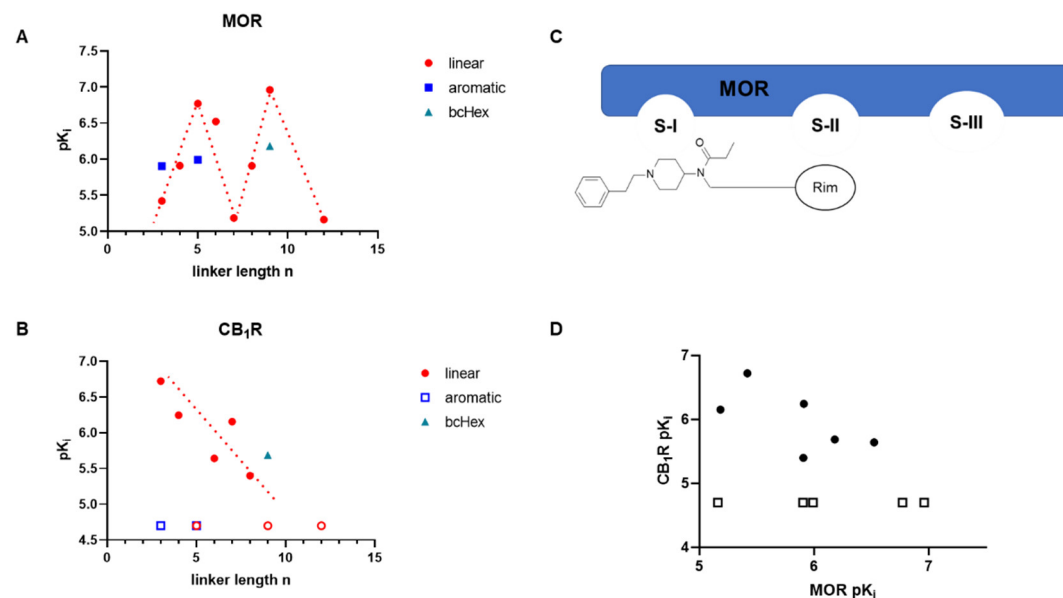

**Figure S2.** Correlational analysis of affinity data regarding fentanyl-related MOR/CB<sub>1</sub>R ligands. A) MOR: Plot of the negative logarithm of the inhibition constant ( $pK_i$ ) against the linker length, expressed as the number ( $n$ ) of methylene units; the dashed lines mark a putative correlation. B) CB<sub>1</sub>R: Plot of the negative logarithm of the inhibition constant ( $pK_i$ ) against the linker length, expressed as the number ( $n$ ) of methylene units. Empty points are given for compounds for which an arbitrary value of  $K_i = 20 \mu\text{M}$  was assigned for the purposes of the plot (reported as  $K_i > 10 \mu\text{M}$ ). C) Hypothetical model of interactions with MOR (discussed in text). S-I is a classical set of interactions for opioid ligands, S-II and S-III represent some interaction subsites in which rimonabant fragment (Rim) could have relatively favourable contacts with MOR, D) Plot of MOR  $pK_i$  against CB<sub>1</sub>R  $pK_i$ . Empty points are given for compounds for which an arbitrary value of  $K_i = 20 \mu\text{M}$  was assigned for the purposes of the plot (reported as  $K_i > 10 \mu\text{M}$ ).

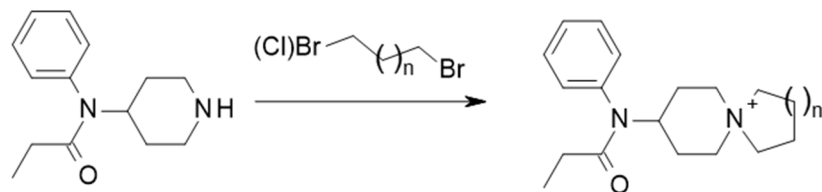

**5.19**

**Scheme S2.** Reaction of norfentanyl (**5.19**) with  $\alpha,\omega$ -bromochloroalkanes.

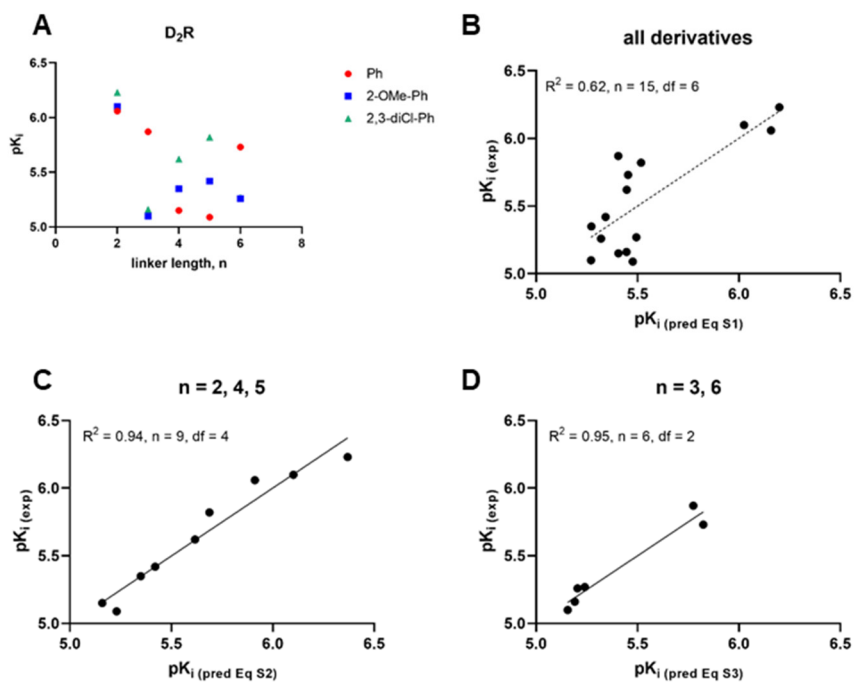

**Figure S3.** Correlational analysis of affinity data regarding fentanyl-related MOR/D<sub>2</sub>-likeR ligands. A) Plot of the negative logarithm of the inhibition constant ( $\text{pK}_i$ ) of D<sub>2</sub>R affinity versus the linker length ( $n$  = number of atoms, see Figure 5 and Table 5 in the main text). B-D) Plots of the experimental versus the predicted D<sub>2</sub>R  $\text{pK}_i$ 's calculated with the Equations S1, S2 and S3 (see below).

**The QSAR Equations based on indicator variables for MOR/D<sub>2</sub>R ligands.**

The QSAR equations are linear equations with indicator variables indicating presence or lack of a particular structural feature. The coefficients were obtained by linear regression.

**Table S1.** Indicator variables matrix for compounds **5.3 – 5.18**.

|             | <b>Ar =</b> |                 |                              | <b>n =</b> |          |          |          |          |
|-------------|-------------|-----------------|------------------------------|------------|----------|----------|----------|----------|
| <b>cmpd</b> | <b>Ph</b>   | <b>2-OMe-Ph</b> | <b>2,3-Cl<sub>2</sub>-Ph</b> | <b>2</b>   | <b>3</b> | <b>4</b> | <b>5</b> | <b>6</b> |
| 5.3         | 1           | 0               | 0                            | 1          | 0        | 0        | 0        | 0        |
| 5.4         | 0           | 1               | 0                            | 1          | 0        | 0        | 0        | 0        |
| 5.5         | 0           | 0               | 1                            | 1          | 0        | 0        | 0        | 0        |
| 5.10        | 1           | 0               | 0                            | 0          | 0        | 1        | 0        | 0        |
| 5.11        | 0           | 1               | 0                            | 0          | 0        | 1        | 0        | 0        |
| 5.12        | 0           | 0               | 1                            | 0          | 0        | 1        | 0        | 0        |
| 5.13        | 1           | 0               | 0                            | 0          | 0        | 0        | 1        | 0        |
| 5.14        | 0           | 1               | 0                            | 0          | 0        | 0        | 1        | 0        |
| 5.15        | 0           | 0               | 1                            | 0          | 0        | 0        | 1        | 0        |
| 5.6         | 1           | 0               | 0                            | 0          | 1        | 0        | 0        | 0        |
| 5.7         | 0           | 1               | 0                            | 0          | 1        | 0        | 0        | 0        |
| 5.9         | 0           | 0               | 1                            | 0          | 1        | 0        | 0        | 0        |
| 5.16        | 1           | 0               | 0                            | 0          | 0        | 0        | 0        | 1        |
| 5.17        | 0           | 1               | 0                            | 0          | 0        | 0        | 0        | 1        |
| 5.18        | 0           | 0               | 1                            | 0          | 0        | 0        | 0        | 1        |

**Table S2.** Indicator variables and their coefficients (for Eq S1).

|                  | <b>Ar =</b>     |                              | <b>n =</b> |          |          |          |
|------------------|-----------------|------------------------------|------------|----------|----------|----------|
| <b>intercept</b> | <b>2-OMe-Ph</b> | <b>2,3-Cl<sub>2</sub>-Ph</b> | <b>2</b>   | <b>4</b> | <b>5</b> | <b>6</b> |
| -5.41            | 0.13            | -0.04                        | -0.75      | 0.00     | -0.07    | -0.05    |
| 0.22             | 0.20            | 0.20                         | 0.26       | 0.26     | 0.26     | 0.26     |

**Table S3. Indicator variables and their coefficients (for Eq S2).** Compounds with n = 2, 4, 5.

|                  | <b>Ar =</b>     |                              | <b>n =</b> |          |
|------------------|-----------------|------------------------------|------------|----------|
| <b>intercept</b> | <b>2-OMe-Ph</b> | <b>2,3-Cl<sub>2</sub>-Ph</b> | <b>2</b>   | <b>4</b> |
| -5.23            | -0.19           | -0.46                        | -0.68      | 0.07     |
| 0.12             | 0.13            | 0.13                         | 0.13       | 0.13     |

**Table S4. Indicator variables and their coefficients (for Eq S3).** Compounds with n = 3, 6.

|                  | <b>Ar =</b> |                              | <b>n =</b> |
|------------------|-------------|------------------------------|------------|
| <b>intercept</b> | <b>Ph</b>   | <b>2,3-Cl<sub>2</sub>-Ph</b> | <b>3</b>   |
| -5.20            | -0.62       | -0.04                        | 0.05       |
| 0.09             | 0.11        | 0.11                         | 0.09       |

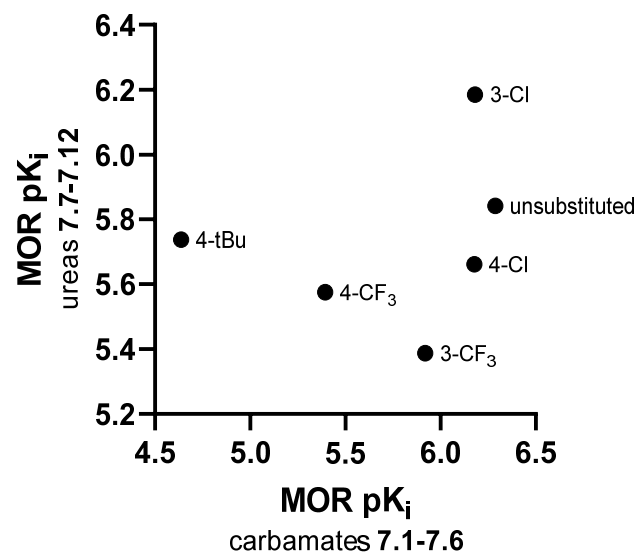

**Figure S4.** Plot of MOR affinities found for ureas versus those found for carbamates of the 7.1-7.12 series. The affinities are given as pK<sub>i</sub> (negative logarithm).

**Table S5.** Structures and activity data for compounds **8.10-8.84**.

| 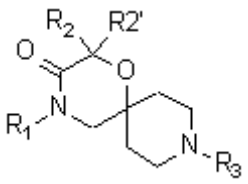 |                    |                                    |                  |                    |                                 |                                              |                                    |                                |      |
|------------------------------------------------------------------------------------|--------------------|------------------------------------|------------------|--------------------|---------------------------------|----------------------------------------------|------------------------------------|--------------------------------|------|
| Cmpd                                                                               | R <sub>1</sub>     | R <sub>2</sub>                     | R <sub>2</sub> ' | R <sub>3</sub>     | K <sub>i</sub> MOR <sup>1</sup> | K <sub>i</sub> σ <sub>1</sub> R <sup>2</sup> | hERG IC <sub>50</sub> <sup>3</sup> | α <sub>1A</sub> R <sup>4</sup> | Ref. |
|                                                                                    |                    |                                    |                  |                    | [nM]                            | [nM]                                         | [μM]                               | % inhibition at 1 μM           |      |
| <b>8.10</b>                                                                        | Ph                 | H                                  | H                | Bzl <sup>5</sup>   | 534 ± 77                        | 26 ± 4                                       | -                                  | -                              | [1]  |
| <b>8.11</b>                                                                        | Ph                 | H                                  | H                | PhEth <sup>6</sup> | 437 ± 13                        | 57 ± 2                                       | -                                  | -                              | [1]  |
| <b>8.12</b>                                                                        | Ph                 | Me                                 | H                | PhEth              | 7 ± 6                           | 6 ± 0.4                                      | 0.4                                | 72                             | [1]  |
| <b>8.13</b>                                                                        | Ph                 | Me                                 | H (S)            | PhEth              | 69 ± 33                         | 14 ± 0.2                                     | 0.3                                | 68                             | [1]  |
| <b>8.14</b>                                                                        | Ph                 | Me                                 | H (R)            | PhEth              | 8 ± 0.5                         | 21 ± 8                                       | 1.2                                | 75                             | [1]  |
| <b>8.15</b>                                                                        | Ph                 | Et                                 | H                | PhEth              | 3 ± 2                           | 6 ± 1                                        | 0.4                                | 75                             | [1]  |
| <b>8.16</b>                                                                        | Ph                 | iPr                                | H                | PhEth              | 1 ± 0.1                         | 10 ± 4                                       | 1.2                                | 65                             | [1]  |
| <b>8.17</b>                                                                        | Ph                 | CH <sub>2</sub> OMe                | H                | PhEth              | 13 ± 3                          | 32 ± 10                                      | 1.9                                | 63                             | [1]  |
| <b>8.18</b>                                                                        | Ph                 | CH <sub>2</sub> OH                 | H                | PhEth              | 46 ± 12                         | 209 ± 77                                     | 1.1                                | 55                             | [1]  |
| <b>8.19</b>                                                                        | Ph                 | CH <sub>2</sub> OBzl               | H                | PhEth              | 40 ± 5                          | 40 ± 8                                       | 0.1                                | 94                             | [1]  |
| <b>8.20</b>                                                                        | Ph                 | CH <sub>2</sub> CO <sub>2</sub> Me | H                | PhEth              | 92 ± 36                         | 54 ± 17                                      | 0.2                                | 72                             | [1]  |
| <b>8.21</b>                                                                        | Ph                 | CH <sub>2</sub> CO <sub>2</sub> H  | H                | PhEth              | >1000                           | >1000                                        | -                                  | -                              | [1]  |
| <b>8.22</b>                                                                        | Ph                 | CH <sub>2</sub> CONMe <sub>2</sub> | H                | PhEth              | 636 ± 172                       | 275 ± 4                                      | -                                  | -                              | [1]  |
| <b>8.23</b>                                                                        | Ph                 | Me                                 | Me               | PhEth              | 3 ± 1                           | 13 ± 4                                       | 0.1                                | 92                             | [1]  |
| <b>8.24</b>                                                                        | Ph                 | spirocyclopropyl                   | -                | PhEth              | 15 ± 2                          | 9 ± 1                                        | 1.2                                | 87                             | [1]  |
| <b>8.25</b>                                                                        | 2-Cl-Ph            | Me                                 | H                | PhEth              | 3 ± 1                           | 8 ± 0.4                                      | 1.0                                | 75                             | [1]  |
| <b>8.26</b>                                                                        | 2-F-Ph             | Me                                 | H                | PhEth              | 8 ± 2                           | 11 ± 4                                       | 1.2                                | 68                             | [1]  |
| <b>8.27</b>                                                                        | 2-OMe-Ph           | Me                                 | H                | PhEth              | 57 ± 7                          | 38 ± 2                                       | -                                  | 78                             | [1]  |
| <b>8.28</b>                                                                        | 2-OH-Ph            | Me                                 | H                | PhEth              | 535 ± 13                        | 51 ± 12                                      | -                                  | 66                             | [1]  |
| <b>8.29</b>                                                                        | 3-OMe-Ph           | Me                                 | H                | PhEth              | 126 ± 71                        | 15 ± 5                                       | 1.0                                | 82                             | [1]  |
| <b>8.30</b>                                                                        | 3-OH-Ph            | Me                                 | H                | PhEth              | 727 ± 583                       | 55 ± 8                                       | -                                  | 67                             | [1]  |
| <b>8.31</b>                                                                        | 4-OMe-Ph           | Me                                 | H                | PhEth              | > 1000                          | 14 ± 0.1                                     | -                                  | 69                             | [1]  |
| <b>8.32</b>                                                                        | 4-OH-Ph            | Me                                 | H                | PhEth              | 606 ± 367                       | 122 ± 13                                     | -                                  | 68                             | [1]  |
| <b>8.33</b>                                                                        | 2-Pyr <sup>7</sup> | Me                                 | H                | PhEth              | 930 ± 320                       | 13 ± 3                                       | -                                  | 63                             | [1]  |

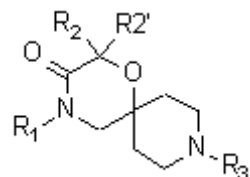

| Cmpd | R <sub>1</sub>           | R <sub>2</sub> | R <sub>2</sub> ' | R <sub>3</sub>         | K <sub>i</sub> MOR <sup>1</sup> | K <sub>i</sub> σ <sub>1</sub> R <sup>2</sup> | hERG IC <sub>50</sub> <sup>3</sup> | α <sub>1A</sub> R <sup>4</sup> | Ref. |
|------|--------------------------|----------------|------------------|------------------------|---------------------------------|----------------------------------------------|------------------------------------|--------------------------------|------|
|      |                          |                |                  |                        | [nM]                            | [nM]                                         | [μM]                               | % inhibition at 1 μM           |      |
| 8.34 | 3-Pyr <sup>8</sup>       | Me             | H                | PhEth                  | 304 ± 76                        | 68 ± 17                                      | -                                  | 69                             | [1]  |
| 8.35 | 4-Pyr <sup>9</sup>       | Me             | H                | PhEth                  | > 1000                          | 88 ± 13                                      | -                                  | 68                             | [1]  |
| 8.36 | 2-pyrazinyl              | Me             | H                | PhEth                  | 304 ± 122                       | 13 ± 6                                       | 0.1                                | 64                             | [1]  |
| 8.37 | 6-CF <sub>3</sub> -2-Pyr | Me             | H                | PhEth                  | 90 ± 36                         | 8 ± 1                                        | -                                  | 95                             | [1]  |
| 8.38 | 3-F-2-Pyr                | Me             | H                | PhEth                  | 93 ± 76                         | 39 ± 6                                       | 1.2                                | 77                             | [1]  |
| 8.39 | 3-CF <sub>3</sub> -2-Pyr | Me             | H                | PhEth                  | 262 ± 47                        | 54 ± 6                                       | 8.2                                | 60                             | [1]  |
| 8.40 | 5-F-3-Pyr                | Me             | H                | PhEth                  | 204 ± 105                       | 3 ± 0.3                                      | 1.1                                | 85                             | [1]  |
| 8.41 | 6-CF <sub>3</sub> -3-Pyr | Me             | H                | PhEth                  | > 1000                          | 9 ± 2                                        | -                                  | 66                             | [1]  |
| 8.42 | 4-CF <sub>3</sub> -3-Pyr | Me             | H                | PhEth                  | 28 ± 19                         | 63 ± 8                                       | 3.3                                | 58                             | [1]  |
| 8.43 | 2-CF <sub>3</sub> -3-Pyr | Me             | H                | PhEth                  | 123 ± 49                        | 48 ± 6                                       | 3.8                                | 55                             | [1]  |
| 8.44 | 5-CF <sub>3</sub> -3-Pyr | Me             | H                | PhEth                  | 261 ± 115                       | 14 ± 2                                       | 0.5                                | 87                             | [1]  |
| 8.45 | Ph                       | Me             | H                | 2-F-PhEth              | 6 ± 3                           | 8 ± 1                                        | 0.8                                | 81                             | [1]  |
| 8.46 | Ph                       | Me             | H                | 3-F-PhEth              | 10 ± 3                          | 8 ± 2                                        | 0.6                                | 74                             | [1]  |
| 8.47 | Ph                       | Me             | H                | 4-F-PhEth              | 19 ± 7                          | 11 ± 4                                       | 0.1                                | 80                             | [1]  |
| 8.48 | Ph                       | Me             | H                | 2-acetylamino-PhEth    | 190 ± 14                        | 656 ± 10                                     | -                                  | 68                             | [1]  |
| 8.49 | Ph                       | Me             | H                | 3-acetylamino-PhEth    | 144 ± 11                        | 147 ± 74                                     | >10                                | 88                             | [1]  |
| 8.50 | Ph                       | Me             | H                | 4-acetylamino-PhEth    | >1000                           | 237 ± 47                                     | -                                  | 60                             | [1]  |
| 8.51 | Ph                       | Me             | H                | 3-CN-PhEth             | 49 ± 14                         | 28 ± 8                                       | 0.6                                | 80                             | [1]  |
| 8.52 | Ph                       | Me             | H                | 2-PyrEth <sup>10</sup> | 90 ± 16                         | 53 ± 14                                      | 2.0                                | 49                             | [1]  |
| 8.53 | Ph                       | Me             | H                | 3-PyrEth <sup>11</sup> | 117 ± 120                       | 91 ± 28                                      | -                                  | 67                             | [1]  |
| 8.54 | Ph                       | Me             | H                | 4-PyrEth <sup>12</sup> | 516 ± 143                       | 112 ± 35                                     | -                                  | 30                             | [1]  |
| 8.55 | 4-CF <sub>3</sub> -3-Pyr | Me             | H                | 2-PyrEth               | 127 ± 78                        | 622 ± 172                                    | -                                  | 47                             | [1]  |
| 8.56 | 4-CF <sub>3</sub> -3-Pyr | Me             | H (R)            | 2-F-PhEth              | 11 ± 4                          | 61 ± 6                                       | 6.3                                | 54                             | [1]  |
| 8.57 | 3-CF <sub>3</sub> -2-Pyr | Me             | H (R)            | 2-F-PhEth              | 34 ± 11                         | 103 ± 27                                     | 6.6                                | 50                             | [1]  |
| 8.58 | Ph                       | Me             | H (R)            | 3-acetylamino-PhEth    | 46 ± 7                          | 205 ± 50                                     | >10                                | 90                             | [1]  |



| Cmpd | R <sub>1</sub>           | R <sub>2</sub>   | R <sub>2</sub> ' | R <sub>3</sub> | K <sub>i</sub> MOR <sup>1</sup> | K <sub>i</sub> σ <sub>1</sub> R <sup>2</sup> | hERG IC <sub>50</sub> <sup>3</sup> | α <sub>1A</sub> R <sup>4</sup> | Ref. |
|------|--------------------------|------------------|------------------|----------------|---------------------------------|----------------------------------------------|------------------------------------|--------------------------------|------|
|      |                          |                  |                  |                | [nM]                            | [nM]                                         | [μM]                               | % inhibition at 1 μM           |      |
| 8.59 | 2-CF <sub>3</sub> -3-Pyr | spirocyclopropyl | -                | 2-F-PhEth      | 175 ± 85                        | 58 ± 10                                      | >10                                | 57                             | [1]  |
| 8.60 | Bzl                      | Me               | H                | PhEth          | 2 ± 0.3                         | 10 ± 3                                       | 0.1                                | 67                             | [2]  |
| 8.61 | PhEth                    | Me               | H                | PhEth          | 20 ± 2                          | 12 ± 2                                       | 0.2                                | 58                             | [2]  |
| 8.62 | cPr (R)                  | Me               | H                | PhEth          | 6 ± 1                           | 58 ± 15                                      | 4.5                                | 51                             | [2]  |
| 8.63 | iPr                      | Me               | H                | PhEth          | 33 ± 5                          | 30 ± 5                                       | 3.9                                | 35                             | [2]  |
| 8.64 | Et                       | Me               | H                | PhEth          | 41 ± 12                         | 43 ± 5                                       | 3.1                                | 27                             | [2]  |
| 8.65 | Me                       | Me               | H                | PhEth          | 156 ± 5                         | 142 ± 28                                     | >10                                | 16                             | [2]  |
| 8.66 | H                        | Me               | H                | 2-F-PhEth      | >1000                           | 892 ± 196                                    | >10                                | 7                              | [2]  |
| 8.67 | Me                       | Me               | H (R)            | PhEth          | 91 ± 10                         | 277 ± 76                                     | >10                                | 19                             | [2]  |
| 8.68 | Me                       | Me               | H (S)            | PhEth          | >1000                           | 165 ± 55                                     | -                                  | 6                              | [2]  |
| 8.69 | Me                       | H                | H                | PhEth          | >1000                           | 282 ± 48                                     | -                                  | 36                             | [2]  |
| 8.70 | Me                       | Et               | H (R)            | PhEth          | 192 ± 41                        | 139 ± 16                                     | 6.6                                | 13                             | [2]  |
| 8.71 | Me                       | iPr              | H                | PhEth          | 115 ± 39                        | 122 ± 24                                     | 6.2                                | 29                             | [2]  |
| 8.72 | Me                       | Ph               | H                | PhEth          | >1000                           | 242 ± 13                                     | -                                  | 26                             | [2]  |
| 8.73 | Me                       | Me               | Me               | PhEth          | >1000                           | 50 ± 5                                       | -                                  | 37                             | [2]  |
| 8.74 | Me                       | spirocyclopropyl | -                | PhEth          | 221 ± 51                        | 161 ± 43                                     | 3.6                                | 41                             | [2]  |
| 8.75 | Et                       | Me               | H (R)            | PhEth          | 26 ± 4                          | 66 ± 19                                      | 4.7                                | 14                             | [2]  |
| 8.76 | Et                       | Me               | H (R)            | 2-F-PhEth      | 18 ± 7                          | 68 ± 18                                      | 4.0                                | 15                             | [2]  |
| 8.77 | Et                       | Me               | H (R)            | 3-F-PhEth      | 56 ± 17                         | 64 ± 30                                      | 6.6                                | 42                             | [2]  |
| 8.78 | Et                       | Me               | H (R)            | 4-F-PhEth      | 164 ± 29                        | 76 ± 12                                      | 1.5                                | 21                             | [2]  |
| 8.79 | Et                       | Me               | H (R)            | 2-F-3-F-PhEth  | 22 ± 10                         | 556 ± 266                                    | >10                                | 8                              | [2]  |
| 8.80 | Et                       | Me               | H (R)            | 2-F-4-F-PhEth  | 62 ± 25                         | 94 ± 12                                      | 2.5                                | 11                             | [2]  |
| 8.81 | Et                       | Me               | H (R)            | 2-F-5-F-PhEth  | 64 ± 5                          | 118 ± 7                                      | >10                                | 21                             | [2]  |
| 8.82 | Et                       | Me               | H (R)            | 2-F-6-F-PhEth  | 21 ± 6                          | 609 ± 253                                    | -                                  | 10                             | [2]  |
| 8.83 | Et                       | spirocyclopropyl | -                | 2-PyrEth       | >1000                           | 783 ± 300                                    | -                                  | 0                              | [2]  |

| 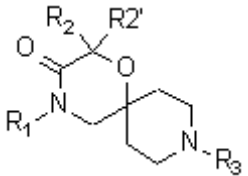 |                |                |                  |                |                                 |                                              |                                    |                                |      |
|------------------------------------------------------------------------------------|----------------|----------------|------------------|----------------|---------------------------------|----------------------------------------------|------------------------------------|--------------------------------|------|
| Cmpd                                                                               | R <sub>1</sub> | R <sub>2</sub> | R <sub>2</sub> ' | R <sub>3</sub> | K <sub>i</sub> MOR <sup>1</sup> | K <sub>i</sub> σ <sub>1</sub> R <sup>2</sup> | hERG IC <sub>50</sub> <sup>3</sup> | α <sub>1A</sub> R <sup>4</sup> | Ref. |
|                                                                                    |                |                |                  |                | [nM]                            | [nM]                                         | [μM]                               | % inhibition at 1 μM           |      |
| <b>8.84</b>                                                                        | Et             | Me             | H (S)            | 2-F-5-F-PhEth  | >1000                           | 135 ± 22                                     | >10                                | 9                              | [2]  |

<sup>1</sup> competitive assays done in transfected CHO-K1 cell membranes, 1 nM [<sup>3</sup>H]DAMGO as radioligand, <sup>2</sup> competitive assays done in transfected HEK293 cell membranes, [<sup>3</sup>H]-(+)-pentazocine as radioligand, radioligand concentration 3 nM [1] or 5 nM [2], <sup>3</sup> whole-cell patch clamp hERG blockade, measured in CHO cells stably expressing hERG channels, <sup>4</sup> competitive assays done in human membranes enriched with α<sub>1A</sub> adrenoreceptor, 0.2 nM [<sup>3</sup>H]prazosin as radioligand, <sup>5</sup> Bzl – benzyl, <sup>6</sup> PhEth - 2-phenethyl, <sup>7</sup> 2-Pyr – 2-pyridyl, <sup>8</sup> 3-Pyr – 3-pyridyl, <sup>9</sup> 4-Pyr – 4-pyridyl, <sup>10</sup> 2-PyrEth – 2-(2-pyridyl)ethyl, <sup>11</sup> 3-PyrEth – 2-(3-pyridyl)ethyl, <sup>12</sup> 4-PyrEth – 2-(4-pyridyl)ethyl.

**Table S6.** Structures and activity data for compounds **8.86-8.147**.

|      | <div>Structure</div> 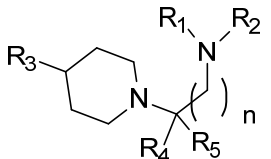 |                                                                                     |   |                                                                                      |                |                | Affinity<br>[K <sub>i</sub> (nM)] |                  |           |
|------|--------------------------------------------------------------------------------------------------------|-------------------------------------------------------------------------------------|---|--------------------------------------------------------------------------------------|----------------|----------------|-----------------------------------|------------------|-----------|
| Cmpd | R <sub>1</sub>                                                                                         | R <sub>2</sub>                                                                      | n | R <sub>3</sub>                                                                       | R <sub>4</sub> | R <sub>5</sub> | σ <sub>1</sub> R <sup>1</sup>     | MOR <sup>2</sup> | Reference |
| 8.86 |                       |    | 1 |    | H              | H              | 38.6 ± 1.7                        | 3.7 ± 0.23       | [3]       |
| 8.87 |                       |    | 1 |    | H              | H              | 1.5 ± 0.07                        | 20.4 ± 1.1       | [3]       |
| 8.88 |                       |    | 1 |    | H              | H              | 1.6 ± 0.22                        | 16.7 ± 0.94      | [3]       |
| 8.89 |                      |   | 1 |   | H              | H              | 4.1 ± 0.35                        | 19.4 ± 0.72      | [3]       |
| 8.90 |                     |  | 1 |  | H              | H              | 573 ± 37                          | > 2000           | [3]       |
| 8.91 |                     |  | 1 |  | H              | H              | 402 ± 34                          | 238 ± 28         | [3]       |

|      | Structure<br>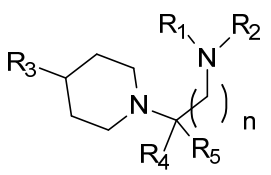 |                                                                                     |   |                                                                                      |                |                | Affinity<br>[K <sub>i</sub> (nM)] |                  |           |
|------|------------------------------------------------------------------------------------------------|-------------------------------------------------------------------------------------|---|--------------------------------------------------------------------------------------|----------------|----------------|-----------------------------------|------------------|-----------|
| Cmpd | R <sub>1</sub>                                                                                 | R <sub>2</sub>                                                                      | n | R <sub>3</sub>                                                                       | R <sub>4</sub> | R <sub>5</sub> | σ <sub>1</sub> R <sup>1</sup>     | MOR <sup>2</sup> | Reference |
| 8.92 |               |    | 1 |    | H              | H              | 506 ± 28                          | 253 ± 12         | [3]       |
| 8.93 |               |    | 1 |    | H              | H              | 835 ± 132                         | > 2000           | [3]       |
| 8.94 |               |    | 1 |    | H              | H              | 17.4 ± 1.9                        | 694 ± 49         | [3]       |
| 8.95 |               |    | 1 |    | H              | H              | 18.7 ± 0.9                        | 573 ± 89         | [3]       |
| 8.96 |             |  | 1 |  | H              | H              | 269 ± 18                          | > 2000           | [3]       |
| 8.97 |             |  | 2 |  | H              | H              | 2.2 ± 0.16                        | 43 ± 3.4         | [3]       |
| 8.98 |             |  | 3 |  | H              | H              | 18 ± 1.92                         | 78 ± 6.3         | [3]       |

|       | <div>Structure</div> 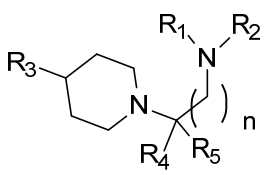 |                                                                                     |   |                                                                                      |                |                | Affinity<br>[K <sub>i</sub> (nM)] |                  |           |
|-------|--------------------------------------------------------------------------------------------------------|-------------------------------------------------------------------------------------|---|--------------------------------------------------------------------------------------|----------------|----------------|-----------------------------------|------------------|-----------|
| Cmpd  | R <sub>1</sub>                                                                                         | R <sub>2</sub>                                                                      | n | R <sub>3</sub>                                                                       | R <sub>4</sub> | R <sub>5</sub> | σ <sub>1</sub> R <sup>1</sup>     | MOR <sup>2</sup> | Reference |
| 8.99  |                       |    | 4 |    | H              | H              | 42 ± 4.8                          | 165 ± 2.4        | [3]       |
| 8.100 |                       |    | 1 |    | H              | H              | 39 ± 4.7                          | 26 ± 1.7         | [3]       |
| 8.101 |                       |    | 1 |    | H              | H              | 372 ± 32                          | 82 ± 9.3         | [3]       |
| 8.102 |                       |    | 1 |    | H              | H              | 893 ± 74                          | 74 ± 3.1         | [3]       |
| 8.103 |                      |   | 1 |   | H              | H              | 35 ± 1.6                          | 77 ± 7.4         | [3]       |
| 8.104 |                     |  | 1 |  | H              | H              | 1.86 ± 0.05                       | 2.1 ± 0.16       | [3]       |
| 8.105 |                     |  | 1 |  | H              | H              | 29 ± 1.3                          | 82 ± 19          | [3]       |

|       | Structure<br>  |                |   |                |                |                | Affinity<br>[K <sub>i</sub> (nM)] |                  |           |
|-------|----------------|----------------|---|----------------|----------------|----------------|-----------------------------------|------------------|-----------|
| Cmpd  | R <sub>1</sub> | R <sub>2</sub> | n | R <sub>3</sub> | R <sub>4</sub> | R <sub>5</sub> | σ <sub>1</sub> R <sup>1</sup>     | MOR <sup>2</sup> | Reference |
| 8.106 |                |                | 1 |                | H              | H              | 2.4 ± 0.32                        | 27.9 ± 3.8       | [3]       |
| 8.107 |                |                | 1 |                | H              | H              | 47 ± 2.4                          | 148 ± 26         | [3]       |
| 8.108 |                |                | 1 |                | H              | H              | 1.3 ± 0.22                        | 5.6 ± 0.36       | [3]       |
| 8.109 |                |                | 1 |                | Me             | Me             | 155.9 ± 10.3                      | > 1000           | [4]       |
| 8.110 |                |                | 1 |                | H              | Me             | 16.3 ± 2.7                        | 9.4 ± 0.75       | [4]       |
| 8.111 |                |                | 1 |                | H              | Et             | 112.4 ± 6.5                       | 20.7 ± 2.9       | [4]       |
| 8.112 |                |                | 1 |                | H              | Me             | 122.9 ± 4.6                       | 0.22 ± 0.03      | [4]       |

|       | Structure<br>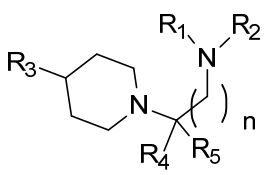 |                                                                                     |   |                                                                                      |                |                | Affinity<br>[K <sub>i</sub> (nM)] |                  |           |
|-------|------------------------------------------------------------------------------------------------|-------------------------------------------------------------------------------------|---|--------------------------------------------------------------------------------------|----------------|----------------|-----------------------------------|------------------|-----------|
| Cmpd  | R <sub>1</sub>                                                                                 | R <sub>2</sub>                                                                      | n | R <sub>3</sub>                                                                       | R <sub>4</sub> | R <sub>5</sub> | σ <sub>1</sub> R <sup>1</sup>     | MOR <sup>2</sup> | Reference |
| 8.113 |               |    | 1 |    | H              | Me             | 41.5 ± 1.2                        | 26.5 ± 2.6       | [4]       |
| 8.114 |               |    | 1 |    | H              | Me             | 59.8 ± 4.8                        | 960.1 ± 15.4     | [4]       |
| 8.115 |               |    | 1 |    | H              | Me             | 168.1 ± 12.9                      | 90.3 ± 3.2       | [4]       |
| 8.116 |               |    | 1 |    | H              | Me             | 178.0 ± 11.5                      | 33.6 ± 2.7       | [4]       |
| 8.117 |              |   | 1 | H                                                                                    | H              | Me             | > 1000                            | 189.7 ± 12.5     | [4]       |
| 8.118 |             |  | 1 | Me                                                                                   | H              | Me             | >1000                             | >1000            | [4]       |
| 8.119 |             |  | 1 |  | H              | Me             | 113.4 ± 10.1                      | 906.3 ± 43.2     | [4]       |

|       | Structure<br>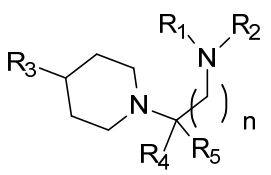 |                                                                                     |   |                                                                                      |                |                | Affinity<br>[K <sub>i</sub> (nM)] |                  |           |
|-------|------------------------------------------------------------------------------------------------|-------------------------------------------------------------------------------------|---|--------------------------------------------------------------------------------------|----------------|----------------|-----------------------------------|------------------|-----------|
| Cmpd  | R <sub>1</sub>                                                                                 | R <sub>2</sub>                                                                      | n | R <sub>3</sub>                                                                       | R <sub>4</sub> | R <sub>5</sub> | σ <sub>1</sub> R <sup>1</sup>     | MOR <sup>2</sup> | Reference |
| 8.120 |               |    | 1 |    | H              | Me             | 572.4 ± 14.7                      | 90.2 ± 5.4       | [4]       |
| 8.121 |               |    | 1 |    | H              | Me             | 262.8 ± 15.9                      | 359.2 ± 25.8     | [4]       |
| 8.122 |               |    | 1 |    | H              | Me             | NT                                | > 1000           | [4]       |
| 8.123 |               |    | 1 |    | H              | Me             | 186.7 ± 10.2                      | 5.0 ± 0.82       | [4]       |
| 8.124 |             |   | 1 |  | H              | Me             | NT                                | > 1000           | [4]       |
| 8.125 |             |  | 1 |  | H              | Me             | NT                                | > 1000           | [4]       |
| 8.126 |             |  | 1 |  | H              | Me             | 34.9 ± 1.7                        | 3.7 ± 1.0        | [4]       |

|       | Structure<br>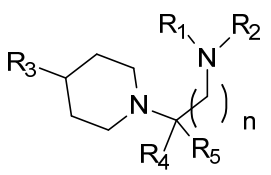 |                                                                                     |   |                                                                                      |                |                | Affinity<br>[K <sub>i</sub> (nM)] |                  |           |
|-------|------------------------------------------------------------------------------------------------|-------------------------------------------------------------------------------------|---|--------------------------------------------------------------------------------------|----------------|----------------|-----------------------------------|------------------|-----------|
| Cmpd  | R <sub>1</sub>                                                                                 | R <sub>2</sub>                                                                      | n | R <sub>3</sub>                                                                       | R <sub>4</sub> | R <sub>5</sub> | σ <sub>1</sub> R <sup>1</sup>     | MOR <sup>2</sup> | Reference |
| 8.127 |               |    | 1 |    | H              | Me             | NT                                | > 1000           | [4]       |
| 8.128 |               |    | 1 |    | H              | Me             | NT                                | 608.2 ± 4.2      | [4]       |
| 8.129 |               |    | 1 |    | H              | Me             | NT                                | > 1000           | [4]       |
| 8.130 |               |    | 1 |    | H              | Me             | NT                                | > 1000           | [4]       |
| 8.131 |              |   | 1 |   | H              | Me             | 5.5 ± 0.18                        | 4.4 ± 0.15       | [4]       |
| 8.132 |             |  | 1 |  | H              | Me             | 67.1 ± 3.6                        | 3.3 ± 0.74       | [4]       |
| 8.133 |             |  | 1 |  | H              | Me             | 79.7 ± 5.4                        | 116.0 ± 6.8      | [4]       |

|       | Structure<br>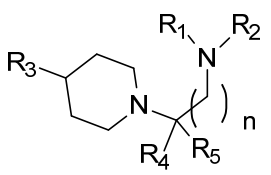 |                                                                                     |   |                                                                                      |                |                | Affinity<br>[K <sub>i</sub> (nM)] |                  |           |
|-------|------------------------------------------------------------------------------------------------|-------------------------------------------------------------------------------------|---|--------------------------------------------------------------------------------------|----------------|----------------|-----------------------------------|------------------|-----------|
| Cmpd  | R <sub>1</sub>                                                                                 | R <sub>2</sub>                                                                      | n | R <sub>3</sub>                                                                       | R <sub>4</sub> | R <sub>5</sub> | σ <sub>1</sub> R <sup>1</sup>     | MOR <sup>2</sup> | Reference |
| 8.134 |               |    | 1 |    | H              | Me             | 218.6 ± 11.5                      | 6.1 ± 0.93       | [4]       |
| 8.135 |               |    | 1 |    | H              | Me             | 222.0 ± 18.3                      | 34.3 ± 1.3       | [4]       |
| 8.136 |               |    | 1 |    | H              | Me             | 272.0 ± 18.2                      | 739.1 ± 25.9     | [4]       |
| 8.137 |               |    | 1 |    | H              | Me             | NT                                | > 1000           | [4]       |
| 8.138 |              |   | 1 |   | H              | Me             | 30.2 ± 2.6                        | 968.8 ± 39.5     | [4]       |
| 8.139 |             |  | 1 |  | H              | Me             | NT                                | > 1000           | [4]       |
| 8.140 |             |  | 1 |  | H              | Me             | 409.5 ± 6.8                       | 1.1 ± 0.03       | [4]       |

|              | <div style="text-align: center;"> <b>Structure</b><br/> 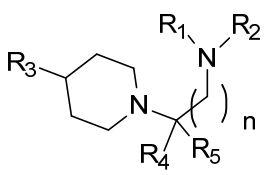 </div> |                                                                                     |          |                                                                                      |                      |                                  | <b>Affinity</b><br><b>[K<sub>i</sub> (nM)]</b> |                        |                  |
|--------------|--------------------------------------------------------------------------------------------------------------------------------------------------|-------------------------------------------------------------------------------------|----------|--------------------------------------------------------------------------------------|----------------------|----------------------------------|------------------------------------------------|------------------------|------------------|
| <b>Cmpd</b>  | <b>R<sub>1</sub></b>                                                                                                                             | <b>R<sub>2</sub></b>                                                                | <b>n</b> | <b>R<sub>3</sub></b>                                                                 | <b>R<sub>4</sub></b> | <b>R<sub>5</sub></b>             | <b>σ<sub>1</sub>R<sup>1</sup></b>              | <b>MOR<sup>2</sup></b> | <b>Reference</b> |
| <b>8.141</b> |                                                                 |    | 1        |    | H                    | Me                               | NT                                             | > 1000                 | [4]              |
| <b>8.142</b> |                                                                 |    | 1        |    | H                    | Me                               | NT                                             | > 1000                 | [4]              |
| <b>8.143</b> |                                                                 |    | 1        |    | H                    | Me                               | 22.8 ± 1.7                                     | 71.0 ± 3.0             | [4]              |
| <b>8.144</b> |                                                                |   | 1        |   | H                    | Me                               | NT                                             | > 1000                 | [4]              |
| <b>8.145</b> |                                                               |  | 1        |  | H                    | Me                               | 191.2 ± 14.3                                   | 861.7 ± 16.4           | [4]              |
| <b>8.146</b> |                                                               |  | 1        |  | H                    | Me<br>( <i>S</i> )-configuration | 19.4 ± 0.78                                    | 4.3 ± 0.15             | [4]              |

|       | Structure<br>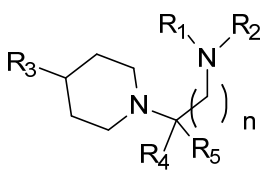 |                                                                                   |   |                                                                                    |                |                         | Affinity<br>[K <sub>i</sub> (nM)] |                  |           |
|-------|------------------------------------------------------------------------------------------------|-----------------------------------------------------------------------------------|---|------------------------------------------------------------------------------------|----------------|-------------------------|-----------------------------------|------------------|-----------|
| Cmpd  | R <sub>1</sub>                                                                                 | R <sub>2</sub>                                                                    | n | R <sub>3</sub>                                                                     | R <sub>4</sub> | R <sub>5</sub>          | σ <sub>1</sub> R <sup>1</sup>     | MOR <sup>2</sup> | Reference |
| 8.147 |               |  | 1 |  | H              | Me<br>(R)-configuration | 24.2 ± 1.6                        | 893.2 ± 12.9     | [4]       |

<sup>1</sup> competitive assays done in membrane preparation from guinea pig brain, [<sup>3</sup>H]-(+)-pentazocine as radioligand, <sup>2</sup> competitive assays done in membranes from CHO cells expressing MOR and [<sup>3</sup>H]diprenorphine as radioligand (in Ref. [3]) or competitive assays done in membranes from rat brains and [<sup>3</sup>H]DAMGO as radioligand (in Ref. [4]).

**Table S7.** Crystal structures of the  $\mu$ -opioid receptor.

|        |                 | STRUCTURE |      |            |          | LIGAND       |                |            |           |
|--------|-----------------|-----------|------|------------|----------|--------------|----------------|------------|-----------|
| IUPHAR | Receptor family | Method    | PDB  | Resolution | State    | Name         | Type           | Function   | Reference |
| $\mu$  | Opioid          | X-ray     | 4DKL | 2.8        | Inactive | $\beta$ -FNA | small molecule | Antagonist | [5]       |
| $\mu$  | Opioid          | X-ray     | 5C1M | 2.1        | Active   | BU72         | small molecule | Agonist    | [6]       |
| $\mu$  | Opioid          | cryo-EM   | 6DDE | 3.5        | Active   | DAMGO        | peptide        | Agonist    | [7]       |
| $\mu$  | Opioid          | cryo-EM   | 6DDF | 3.5        | Active   | DAMGO        | peptide        | Agonist    | [7]       |

**Table S8.** Crystal structures of selected GPCRs relevant to the scope of the review.

|        |                 | STRUCTURE |      |            |          | LIGAND      |                |            |           |
|--------|-----------------|-----------|------|------------|----------|-------------|----------------|------------|-----------|
| IUPHAR | Receptor family | Method    | PDB  | Resolution | State    | Name        | Type           | Function   | Reference |
| NK1    | Tachykinin      | X-ray     | 6E59 | 3.4        | Inactive | L760735     | small molecule | Antagonist | [8]       |
| NK1    | Tachykinin      | X-ray     | 6HLL | 3.3        | Inactive | CP-99,994   | small molecule | Antagonist | [9]       |
| NK1    | Tachykinin      | X-ray     | 6HLO | 2.4        | Inactive | Aprepitant  | small molecule | Antagonist | [9]       |
| NK1    | Tachykinin      | X-ray     | 6HLP | 2.2        | Inactive | Netupitant  | small molecule | Antagonist | [9]       |
| NK1    | Tachykinin      | X-ray     | 6J20 | 2.7        | Inactive | Aprepitant  | small molecule | Antagonist | [10]      |
| NK1    | Tachykinin      | X-ray     | 6J21 | 3.2        | Inactive | Aprepitant  | small molecule | Antagonist | [10]      |
| NK1    | Tachykinin      | cryo-EM   | 7P00 | 2.7        | Active   | Substance P | peptide        | Agonist    | [11]      |

|        |                 | STRUCTURE |      |            |          | LIGAND           |                |                 |           |
|--------|-----------------|-----------|------|------------|----------|------------------|----------------|-----------------|-----------|
| IUPHAR | Receptor family | Method    | PDB  | Resolution | State    | Name             | Type           | Function        | Reference |
| NK1    | Tachykinin      | cryo-EM   | 7P02 | 2.9        | Active   | Substance P      | peptide        | Agonist         | [11]      |
| NK1    | Tachykinin      | cryo-EM   | 7RMG | 3          | Active   | Substance P      | peptide        | Agonist         | [12]      |
| NK1    | Tachykinin      | cryo-EM   | 7RMH | 3.1        | Active   | Substance P      | peptide        | Agonist         | [12]      |
| NK1    | Tachykinin      | cryo-EM   | 7RMI | 3.2        | Active   | Substance P 6-11 | peptide        | Agonist         | [12]      |
| D4     | Dopamine        | X-ray     | 5WIU | 2          | Inactive | Nemonapride      | small molecule | Antagonist      | [13]      |
| D4     | Dopamine        | X-ray     | 5WIV | 2.1        | Inactive | Nemonapride      | small molecule | Antagonist      | [13]      |
| D4     | Dopamine        | X-ray     | 6IQL | 3.5        | Inactive | L745870          | small molecule | Antagonist      | [14]      |
| D3     | Dopamine        | X-ray     | 3PBL | 2.9        | Inactive | Eticlopride      | small molecule | Antagonist      | [15]      |
| D3     | Dopamine        | cryo-EM   | 7CMU | 3          | Active   | Pramipexole      | small molecule | Agonist         | [16]      |
| D3     | Dopamine        | cryo-EM   | 7CMV | 2.7        | Active   | PD128907         | small molecule | Agonist         | [16]      |
| D2     | Dopamine        | X-ray     | 6CM4 | 2.9        | Inactive | Risperidone      | small molecule | Inverse agonist | [17]      |
| D2     | Dopamine        | X-ray     | 6LUQ | 3.1        | Inactive | Haloperidol      | small molecule | Antagonist      | [18]      |
| D2     | Dopamine        | cryo-EM   | 6VMS | 3.8        | Active   | Bromocriptine    | small molecule | Agonist         | [19]      |
| D2     | Dopamine        | X-ray     | 7DFP | 3.1        | Inactive | Spiperone        | small molecule | Antagonist      | [20]      |
| D2     | Dopamine        | cryo-EM   | 7JVR | 2.8        | Active   | Bromocriptine    | small molecule | Agonist         | [21]      |

|        |                 | STRUCTURE |      |            |          | LIGAND                                                                              |                |                 |           |
|--------|-----------------|-----------|------|------------|----------|-------------------------------------------------------------------------------------|----------------|-----------------|-----------|
| IUPHAR | Receptor family | Method    | PDB  | Resolution | State    | Name                                                                                | Type           | Function        | Reference |
| CB1    | Cannabinoid     | X-ray     | 5TGZ | 2.8        | Inactive | AM-6538                                                                             | small molecule | Antagonist      | [22]      |
| CB1    | Cannabinoid     | X-ray     | 5U09 | 2.6        | Inactive | Taranabant                                                                          | small molecule | Inverse agonist | [23]      |
| CB1    | Cannabinoid     | X-ray     | 5XR8 | 3          | Active   | AM841                                                                               | small molecule | Agonist         | [24]      |
| CB1    | Cannabinoid     | X-ray     | 5XRA | 2.8        | Active   | AM11542                                                                             | small molecule | Agonist         | [24]      |
| CB1    | Cannabinoid     | cryo-EM   | 6KPG | 3          | Active   | AM841                                                                               | small molecule | Agonist         | [25]      |
| CB1    | Cannabinoid     | X-ray     | 6KQI | 3.3        | Inactive | ORG27569                                                                            | small molecule | NAM             | [26]      |
| CB1    | Cannabinoid     | cryo-EM   | 6N4B | 3          | Active   | MDMB-Fubinaca                                                                       | small molecule | Agonist         | [27]      |
| CB1    | Cannabinoid     | X-ray     | 7V3Z | 3.3        | Active   | 2-[(1R,2R,5R)-5-Hydroxy-2-(3-hydroxypropyl)cyclohexyl]-5-(2-methyloctan-2-yl)phenol | small molecule | Agonist         | [28]      |

**Table S9.** Crystal structures of the  $\sigma$ -receptors.

| Receptor   | STRUCTURE |      |            | LIGAND          | Reference |
|------------|-----------|------|------------|-----------------|-----------|
|            | Method    | PDB  | Resolution | Name            |           |
| $\sigma 1$ | X-ray     | 5HK1 | 2.51       | PD144418        | [29]      |
| $\sigma 1$ | X-ray     | 5HK2 | 3.2        | 4-IBP           | [29]      |
| $\sigma 1$ | X-ray     | 6DJZ | 3.08       | haloperidol     | [30]      |
| $\sigma 1$ | X-ray     | 6DK1 | 3.12       | (+)-pentazocine | [30]      |
| $\sigma 1$ | X-ray     | 6DK0 | 2.90       | NE-100          | [30]      |
| $\sigma 2$ | X-ray     | 7M93 | 2.94       | PB28            | [31]      |
| $\sigma 2$ | X-ray     | 7M94 | 2.71       | Roluperidone    | [31]      |
| $\sigma 2$ | X-ray     | 7M95 | 2.41       | Z1241145220     | [31]      |
| $\sigma 2$ | X-ray     | 7M96 | 2.41       | Z4857158944     | [31]      |
| $\sigma 2$ | X-ray     | 7MFI | 2.81       | Cholesterol     | [31]      |

## References

- García, M.; Virgili, M.; Alonso, M.; Alegret, C.; Fernández, B.; Port, A.; Pascual, R.; Monroy, X.; Vidal-Torres, A.; Serafini, M.-T.; et al. 4-Aryl-1-oxa-4,9-diazaspiro[5.5]undecane Derivatives as Dual  $\mu$ -Opioid Receptor Agonists and  $\sigma 1$  Receptor Antagonists for the Treatment of Pain. *J. Med. Chem.* **2020**, *63*, 2434–2454.
- García, M.; Virgili, M.; Alonso, M.; Alegret, C.; Farran, J.; Fernández, B.; Bordas, M.; Pascual, R.; Burgueño, J.; Vidal-Torres, A.; et al. Discovery of EST73502, a Dual  $\mu$ -Opioid Receptor Agonist and  $\sigma 1$  Receptor Antagonist Clinical Candidate for the Treatment of Pain. *J. Med. Chem.* **2020**, *63*, 15508–15526.
- Xiong, J.; Jin, J.; Gao, L.; Hao, C.; Liu, X.; Liu, B.-F.; Chen, Y.; Zhang, G. Piperidine propionamide as a scaffold for potent sigma-1 receptor antagonists and mu opioid receptor agonists for treating neuropathic pain. *Eur. J. Med. Chem.* **2020**, *191*, 112144.
- Xiong, J.; Zhuang, T.; Ma, Y.; Xu, J.; Ye, J.; Ma, R.; Zhang, S.; Liu, X.; Liu, B.-F.; Hao, C.; et al. Optimization of bifunctional piperidinamide derivatives as  $\sigma 1$ R Antagonists/MOR agonists for treating neuropathic pain. *Eur. J. Med. Chem.* **2021**, *226*, 113879.
- Manglik, A.; Kruse, A.C.; Kobilka, T.S.; Thian, F.S.; Mathiesen, J.M.; Sunahara, R.K.; Pardo, L.; Weis, W.I.; Kobilka, B.K.; Granier, S. Crystal structure of the  $\mu$ -opioid receptor bound to a morphinan antagonist. *Nature* **2012**, *485*, 321–326.
- Huang, W.; Manglik, A.; Venkatakrishnan, A.J.; Laeremans, T.; Feinberg, E.N.; Sanborn, A.L.; Kato, H.E.; Livingston, K.E.; Thorsen, T.S.; Kling,

R.C.; et al. Structural insights into  $\mu$ -opioid receptor activation. *Nature* **2015**, *524*, 315–321.

7. Koehl, A.; Hu, H.; Maeda, S.; Zhang, Y.; Qu, Q.; Paggi, J.M.; Latorraca, N.R.; Hilger, D.; Dawson, R.; Matile, H.; et al. Structure of the  $\mu$ -opioid receptor–Gi protein complex. *Nature* **2018**, *558*, 547–552.
8. Yin, J.; Chapman, K.; Clark, L.D.; Shao, Z.; Borek, D.; Xu, Q.; Wang, J.; Rosenbaum, D.M. Crystal structure of the human NK 1 tachykinin receptor. *Proc. Natl. Acad. Sci.* **2018**, *115*, 13264–13269.
9. Schöppe, J.; Ehrenmann, J.; Klenk, C.; Rucktooa, P.; Schütz, M.; Doré, A.S.; Plückthun, A. Crystal structures of the human neurokinin 1 receptor in complex with clinically used antagonists. *Nat. Commun.* **2019**, *10*, 17.
10. Chen, S.; Lu, M.; Liu, D.; Yang, L.; Yi, C.; Ma, L.; Zhang, H.; Liu, Q.; Frimurer, T.M.; Wang, M.-W.; et al. Human substance P receptor binding mode of the antagonist drug aprepitant by NMR and crystallography. *Nat. Commun.* **2019**, *10*, 638.
11. Thom, C.; Ehrenmann, J.; Vacca, S.; Waltenspühl, Y.; Schöppe, J.; Medalia, O.; Plückthun, A. Structures of neurokinin 1 receptor in complex with G q and G s proteins reveal substance P binding mode and unique activation features. *Sci. Adv.* **2021**, *7*.
12. Harris, J.A.; Faust, B.; Gondin, A.B.; Dämgen, M.A.; Suomivuori, C.-M.; Veldhuis, N.A.; Cheng, Y.; Dror, R.O.; Thal, D.M.; Manglik, A. Selective G protein signaling driven by substance P–neurokinin receptor dynamics. *Nat. Chem. Biol.* **2022**, *18*, 109–115.
13. Wang, S.; Wacker, D.; Levit, A.; Che, T.; Betz, R.M.; McCorvy, J.D.; Venkatakrishnan, A.J.; Huang, X.-P.; Dror, R.O.; Shoichet, B.K.; et al. D 4 dopamine receptor high-resolution structures enable the discovery of selective agonists. *Science (80-. )*. **2017**, *358*, 381–386.
14. Zhou, Y.; Cao, C.; He, L.; Wang, X.; Zhang, X.C. Crystal structure of dopamine receptor D4 bound to the subtype selective ligand, L745870. *Elife* **2019**, *8*.
15. Chien, E.Y.T.; Liu, W.; Zhao, Q.; Katritch, V.; Won Han, G.; Hanson, M.A.; Shi, L.; Newman, A.H.; Javitch, J.A.; Cherezov, V.; et al. Structure of the Human Dopamine D3 Receptor in Complex with a D2/D3 Selective Antagonist. *Science (80-. )*. **2010**, *330*, 1091–1095.
16. Xu, P.; Huang, S.; Mao, C.; Krumm, B.E.; Zhou, X.E.; Tan, Y.; Huang, X.-P.; Liu, Y.; Shen, D.-D.; Jiang, Y.; et al. Structures of the human dopamine D3 receptor–Gi complexes. *Mol. Cell* **2021**, *81*, 1147–1159.e4.
17. Wang, S.; Che, T.; Levit, A.; Shoichet, B.K.; Wacker, D.; Roth, B.L. Structure of the D2 dopamine receptor bound to the atypical antipsychotic drug risperidone. *Nature* **2018**, *555*, 269–273.
18. Fan, L.; Tan, L.; Chen, Z.; Qi, J.; Nie, F.; Luo, Z.; Cheng, J.; Wang, S. Haloperidol bound D2 dopamine receptor structure inspired the discovery of subtype selective ligands. *Nat. Commun.* **2020**, *11*, 1074.
19. Yin, J.; Chen, K.-Y.M.; Clark, M.J.; Hijazi, M.; Kumari, P.; Bai, X.; Sunahara, R.K.; Barth, P.; Rosenbaum, D.M. Structure of a D2 dopamine receptor–G-protein complex in a lipid membrane. *Nature* **2020**, *584*, 125–129.

20. Im, D.; Inoue, A.; Fujiwara, T.; Nakane, T.; Yamanaka, Y.; Uemura, T.; Mori, C.; Shiimura, Y.; Kimura, K.T.; Asada, H.; et al. Structure of the dopamine D2 receptor in complex with the antipsychotic drug spiperone. *Nat. Commun.* **2020**, *11*, 6442.
21. Zhuang, Y.; Xu, P.; Mao, C.; Wang, L.; Krumm, B.; Zhou, X.E.; Huang, S.; Liu, H.; Cheng, X.; Huang, X.-P.; et al. Structural insights into the human D1 and D2 dopamine receptor signaling complexes. *Cell* **2021**, *184*, 931-942.e18.
22. Hua, T.; Vemuri, K.; Pu, M.; Qu, L.; Han, G.W.; Wu, Y.; Zhao, S.; Shui, W.; Li, S.; Korde, A.; et al. Crystal Structure of the Human Cannabinoid Receptor CB1. *Cell* **2016**, *167*, 750-762.e14.
23. Shao, Z.; Yin, J.; Chapman, K.; Grzemska, M.; Clark, L.; Wang, J.; Rosenbaum, D.M. High-resolution crystal structure of the human CB1 cannabinoid receptor. *Nature* **2016**, *540*, 602–606.
24. Hua, T.; Vemuri, K.; Nikas, S.P.; Laprairie, R.B.; Wu, Y.; Qu, L.; Pu, M.; Korde, A.; Jiang, S.; Ho, J.-H.; et al. Crystal structures of agonist-bound human cannabinoid receptor CB1. *Nature* **2017**, *547*, 468–471.
25. Hua, T.; Li, X.; Wu, L.; Iliopoulos-Tsoutsouvas, C.; Wang, Y.; Wu, M.; Shen, L.; Brust, C.A.; Nikas, S.P.; Song, F.; et al. Activation and Signaling Mechanism Revealed by Cannabinoid Receptor-Gi Complex Structures. *Cell* **2020**, *180*, 655-665.e18.
26. Shao, Z.; Yan, W.; Chapman, K.; Ramesh, K.; Ferrell, A.J.; Yin, J.; Wang, X.; Xu, Q.; Rosenbaum, D.M. Structure of an allosteric modulator bound to the CB1 cannabinoid receptor. *Nat. Chem. Biol.* **2019**, *15*, 1199–1205.
27. Krishna Kumar, K.; Shalev-Benami, M.; Robertson, M.J.; Hu, H.; Banister, S.D.; Hollingsworth, S.A.; Latorraca, N.R.; Kato, H.E.; Hilger, D.; Maeda, S.; et al. Structure of a Signaling Cannabinoid Receptor 1-G Protein Complex. *Cell* **2019**, *176*, 448-458.e12.
28. Wang, X.; Liu, D.; Shen, L.; Li, F.; Li, Y.; Yang, L.; Xu, T.; Tao, H.; Yao, D.; Wu, L.; et al. A Genetically Encoded F-19 NMR Probe Reveals the Allosteric Modulation Mechanism of Cannabinoid Receptor 1. *J. Am. Chem. Soc.* **2021**, *143*, 16320–16325.
29. Schmidt, H.R.; Zheng, S.; Gurbinar, E.; Koehl, A.; Manglik, A.; Kruse, A.C. Crystal structure of the human  $\sigma_1$  receptor. *Nature* **2016**, *532*, 527–530.
30. Schmidt, H.R.; Betz, R.M.; Dror, R.O.; Kruse, A.C. Structural basis for  $\sigma_1$ receptor ligand recognition. *Nat. Struct. Mol. Biol.* **2018**, *25*, 981–987.
31. Alon, A.; Lyu, J.; Braz, J.M.; Tummino, T.A.; Craik, V.; O’Meara, M.J.; Webb, C.M.; Radchenko, D.S.; Moroz, Y.S.; Huang, X.-P.; et al. Structures of the  $\sigma_2$  receptor enable docking for bioactive ligand discovery. *Nature* **2021**, *600*, 759–764.
